# Supplementary figures and images for: Phase 1 Parkinson’s Disease Studies Show the Dopamine D1/D5 Agonist PF-06649751 is Safe and Well Tolerated
Source: PubMed Central journal article supplement — Neurol Ther. 2018 Oct 25;7(2):307–19. doi: 10.1007/s40120-018-0114-z (PMC6283789; doi:10.1007/s40120-018-0114-z), 2018-10-25

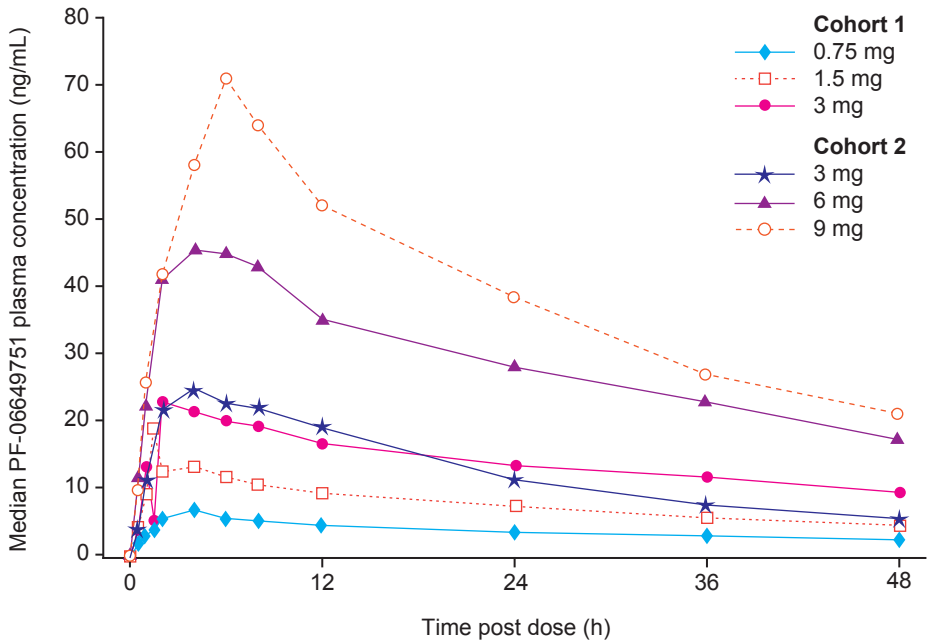

Supplement: 40120_2018_114_MOESM2_ESM.pdf [file 40120_2018_114_MOESM2_ESM.pdf]
