# Supplementary figures and images for: Phase 1 Parkinson’s Disease Studies Show the Dopamine D1/D5 Agonist PF-06649751 is Safe and Well Tolerated
Source: Springer Nature journal article supplement (doi:10.1007/s40120-018-0114-z), 2018-10-25

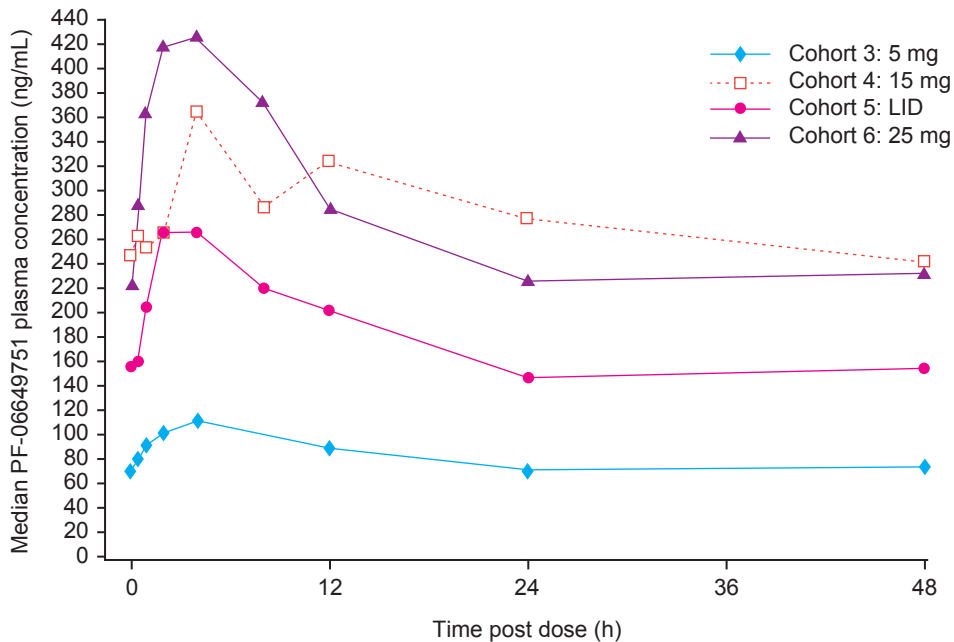

Supplement: MOESM1 [file 16226204]
